# Supplementary material for: Interaction between single-wall carbon nanotubes and encapsulated C60 probed by resonance Raman spectroscopy
Source: Royal Society of Chemistry journal article supplement (doi:10.1039/c000102c), 2010-01-01
Supplement: c000102c.pdf [file c000102c.pdf]

**Online supporting material for:**

Interaction between Single-Wall Carbon Nanotubes and Encapsulated C<sub>60</sub>  
Probed by Resonance Raman Spectroscopy

*Soon-Kil Joung,<sup>1</sup> Toshiya Okazaki,<sup>1,2,\*</sup> Susumu Okada,<sup>3</sup> and Sumio  
Iijima<sup>1</sup>*

<sup>1</sup>*Nanotube Research Center, National Institute of Advanced Industrial  
Science and Technology (AIST), Tsukuba 305-8565, Japan*

<sup>2</sup>*PRESTO, Japan Science and Technology Agency, 4-1-8 Honcho,  
Kawaguchi 332-0012, Japan*

<sup>3</sup>*Institute of Physics and Center for Computational Sciences, University  
of Tsukuba, 1-1-1 Tennodai, Tsukuba 305-8577, Japan, and CREST,  
Japan Science and Technology Agency, 4-1-8 Honcho, Kawaguchi  
332-0012, Japan*

**Table 1.** The observed PL peak position of (17, 3) SWCNTs and C<sub>60</sub> nanopeapods (Figure 1).

| $(n, m)$ | $d_t$<br>(nm) | SWCNTs        |               | C <sub>60</sub> nanopeapods |               |
|----------|---------------|---------------|---------------|-----------------------------|---------------|
|          |               | $E_{11}$ (eV) | $E_{22}$ (eV) | $E_{11}$ (eV)               | $E_{22}$ (eV) |
| (17, 3)  | 1.483         | 0.706         | 1.161         | 0.700                       | 1.161         |
